# Supplementary material
Source: Research Square preprint supplement (doi:10.21203/rs.3.rs-9843466/v1)
Supplement: Supplementary file 1 [file 3e1bfeec3c625bc18a44c472.docx]

1. CH3OH + CH3

Table 1A. Noncorrected values of h

| Q,A | 2000 | 1500 | 1000 | 800 | 600 | 500 | 400 | 298.15 | 200 | 100 |
| --- | --- | --- | --- | --- | --- | --- | --- | --- | --- | --- |
| 2.6 | 0.186905 | 0.151787 | 0.120343 | 0.109421 | 0.099845 | 0.095682 | 0.092016 | 0.088851 | 0.086356 | 0.084350 |
| 2.7 | 0.187120 | 0.152048 | 0.120657 | 0.109746 | 0.100165 | 0.095985 | 0.092290 | 0.089077 | 0.086517 | 0.084446 |
| 2.8 | 0.187312 | 0.152280 | 0.120931 | 0.110030 | 0.100440 | 0.096244 | 0.092522 | 0.089265 | 0.086646 | 0.084517 |
| 2.9 | 0.187461 | 0.152459 | 0.121139 | 0.110241 | 0.100640 | 0.096429 | 0.092680 | 0.089383 | 0.086707 | 0.084515 |
| 3.0 | 0.187569 | 0.152587 | 0.121285 | 0.110387 | 0.100732 | 0.096546 | 0.092774 | 0.089439 | 0.086708 | 0.084450 |
| 3.1 | 0.187644 | 0.152676 | 0.121384 | 0.110483 | 0.100056 | 0.096617 | 0.092824 | 0.089456 | 0.086676 | 0.084348 |
| 3.2 | 0.187694 | 0.152734 | 0.121448 | 0.110544 | 0.100906 | 0.096657 | 0.092848 | 0.089453 | 0.086632 | 0.084238 |
| 3.3 | 0.194061 | 0.157523 | 0.124657 | 0.113118 | 0.102840 | 0.098267 | 0.094129 | 0.090393 | 0.087229 | 0.084463 |
| 3.4 | 0.194082 | 0.157548 | 0.124683 |  |  |  |  |  | 0.087188 | 0.084370 |
| 3.5 | 0.194096 | 0.157565 | 0.124700 |  |  |  |  |  | 0.087155 | 0.084292 |
| 3.6 | 0.194105 | 0.157574 | 0.124709 |  |  |  |  |  | 0.087121 | 0.084219++ |
| 3.7 | 0.194109 |  |  |  |  |  |  |  |  |  |
| 3.8 | 0.200450 |  |  |  |  |  |  |  |  |  |

Table 2A. Uncorrected values of g

| Q,A | 2000 | 1500 | 1000 | 800 | 600 | 500 | 400 | 298.15 |
| --- | --- | --- | --- | --- | --- | --- | --- | --- |
| 2.6 | -0.236215 | -0.135300 | -0.045684 | -0.013672 | 0.015758 | 0.029398 | 0.042252 | 0.054469 |
| 2.7 | -0.242423 | -0.139896 | -0.048651 | -0.015981 | 0.014108 | 0.028075 | 0.041251 | 0.053786 |
| 2.8 | -0.244825 | -0.141644 | -0.049731 | -0.016789 | 0.013572 | 0.027673 | 0.040979 | 0.053636 |
| 2.9 | -0.245554 | -0.142150 | -0.050002 | -0.016964 | 0.013492 | 0.027639 | 0.040986 | 0.053676 |
| 3.0 | -0.247238 | -0.143383 | -0.050778 | -0.017555 | 0.013084 | 0.027319 | 0.040751 | 0.053521 |
| 3.1 | -0.249588 | -0.145125 | -0.051908 | -0.018439 | 0.012443 | 0.026798 | 0.040347 | 0.053227 |
| 3.2 | -0.251529 | -0.146567 | -0.052848 | -0.019179 | 0.011902 | 0.026335 | 0.039999 | 0.052971 |
| 3.3 | -0.276874 | -0.164200 | -0.063306 | -0.026972 | 0.006614 | 0.022242 | 0.036995 | 0.051010 |
| 3.4 | -0.277989 | -0.165030 | -0.063851 |  |  |  |  |  |
| 3.5 | -0.280399 | -0.166834 | -0.065048 |  |  |  |  |  |
| 3.6 | -0.283359 | -0.169052 | -0.066523 |  |  |  |  |  |
| 3.7 | -0.286573 |  |  |  |  |  |  |  |
| 3.8 | -0.324301 |  |  |  |  |  |  |  |

| Q,A | 200 | 100 |
| --- | --- | --- |
| 2.6 | 0.065308 | 0.075195 |
| 2.7 | 0.064913 | 0.075057 |
| 2.8 | 0.064864 | 0.075078 |
| 2.9 | 0.064910 | 0.075111 |
| 3.0 | 0.064818 | 0.075045 |
| 3.1 | 0.064627 | 0.074913 |
| 3.2 | 0.064445 | 0.074780 |
| 3.3 | 0.063377 | 0.074432 |
| 3.4 | 0.063259 | 0.074337 |
| 3.5 | 0.063014 | 0.074186 |
| 3.6 | 0.062709 | 0.074006 |

Table 8A. Imaginary frequencies

| Q, A | νi, cm-1 |
| --- | --- |
| 2.6 | 262.9 149.3 |
| 2.7 | 208.5 124.1 |
| 2.8 | 164.6 165.0 |
| 2.9 | 126.8 88.7 |
| 3.0 | 94.1 74.0 |
| 3.1 | 65.0 57.9 |
| 3.2 | 49.1 23.1 |
| 3.3 | 38.5 |
| 3.4 | 27.3 |
| 3.5 | 18.9 |
| 3.6 | 3.2 |
| 3.7 | 4.3 |
| 3.8 | - |

Table 4A. Corrected values of h

| Q,A | 2000 | 1500 | 1000 | 800 | 600 | 500 | 400 | 298.15 | 200 | 100 |
| --- | --- | --- | --- | --- | --- | --- | --- | --- | --- | --- |
| 2.6 | 0.198657 | 0.160381 | 0.125787 | 0.113610 | 0.102788 | 0.098008 | 0.093733 | 0.089964 | 0.086921 | 0.084468 |
| 2.7 | 0.199045 | 0.160812 | 0.126264 | 0.114095 | 0.103260 | 0.098458 | 0.094144 | 0.090314 | 0.087182 | 0.084610 |
| 2.8 | 0.199375 | 0.161180 | 0.126671 | 0.114508 | 0.103660 | 0.098838 | 0.094493 | 0.090608 | 0.087400 | 0.084730 |
| 2.9 | 0.199643 | 0.161477 | 0.126994 | 0.114833 | 0.103971 | 0.099131 | 0.094755 | 0.090824 | 0.087547 | 0.084782 |
| 3.0 | 0.199857 | 0.161709 | 0.127243 | 0.115080 | 0.104162 | 0.099345 | 0.094944 | 0.090970 | 0.087630 | 0.084777 |
| 3.1 | 0.200033 | 0.161899 | 0.127442 | 0.115275 | 0.103583 | 0.099512 | 0.095088 | 0.091078 | 0.087683 | 0.084742 |
| 3.2 | 0.200198 | 0.162072 | 0.127619 | 0.115449 | 0.104545 | 0.099663 | 0.095222 | 0.091183 | 0.087743 | 0.084723 |
| 3.3 | 0.200307 | 0.162186 | 0.127737 | 0.115565 | 0.104654 | 0.099764 | 0.095310 | 0.091252 | 0.087779 | 0.084700 |
| 3.4 | 0.200354 | 0.162236 | 0.127788 |  |  |  |  |  | 0.087761 | 0.084629 |
| 3.5 | 0.200387 | 0.162272 | 0.127824 |  |  |  |  |  | 0.087746 | 0.084568 |
| 3.6 | 0.200431 | 0.162317 | 0.127869 |  |  |  |  |  | 0.087747 | 0.084528 |
| 3.7 | 0.200433 |  |  |  |  |  |  |  |  |  |
| 3.8 | 0.200450 |  |  |  |  |  |  |  |  |  |
| CH3OH | 0.115370 | 0.093836 | 0.074596 | 0.067936 | 0.062127 | 0.059619 | 0.057419 | 0.055509 | 0.053935 | 0.052512 |
| CH3 | 0.072413 | 0.058999 | 0.046949 | 0.042688 | 0.038818 | 0.037041 | 0.035376 | 0.033971 | 0.032395 | 0.031074 |
| Reag | 0.187783 | 0.152835 | 0.121545 | 0.110624 | 0.100945 | 0.096660 | 0.092795 | 0.089480 | 0.086330 | 0.083586 |

Table 5A. Corrected values of g

| Q,A | 2000 | 1500 | 1000 | 800 | 600 | 500 | 400 | 298.15 |
| --- | --- | --- | --- | --- | --- | --- | --- | --- |
| 2.6 | -0.261810 | -0.151991 | -0.054543 | -0.019805 | 0.012035 | 0.026731 | 0.040518 | 0.053529 |
| 2.7 | -0.270481 | -0.158391 | -0.058657 | -0.022999 | 0.009760 | 0.024912 | 0.039154 | 0.052605 |
| 2.8 | -0.275298 | -0.161916 | -0.060877 | -0.024693 | 0.008591 | 0.024003 | 0.038495 | 0.052198 |
| 2.9 | -0.278626 | -0.164342 | -0.062389 | -0.025838 | 0.007812 | 0.023405 | 0.038072 | 0.051943 |
| 3.0 | -0.283240 | -0.167746 | -0.064578 | -0.027539 | 0.006596 | 0.022428 | 0.037331 | 0.051435 |
| 3.1 | -0.289395 | -0.172316 | -0.067560 | -0.029885 | 0.004883 | 0.021030 | 0.036244 | 0.050655 |
| 3.2 | -0.298890 | -0.179395 | -0.072220 | -0.033578 | 0.002155 | 0.018763 | 0.034475 | 0.049368 |
| 3.3 | -0.299671 | -0.179953 | -0.072553 | -0.033822 | 0.002002 | 0.018673 | 0.034405 | 0.049335 |
| 3.4 | -0.302938 | -0.182391 | -0.074162 |  |  |  |  |  |
| 3.5 | -0.307658 | -0.185923 | -0.076504 |  |  |  |  |  |
| 3.6 | -0.321831 | -0.196541 | -0.083568 |  |  |  |  |  |
| 3.7 | -0.323176 |  |  |  |  |  |  |  |
| 3.8 | -0.324301 |  |  |  |  |  |  |  |
| CH3OH | -0.183175 | -0.111522 | -0.046791 | -0.023242 | -0.001263 | 0.009077 | 0.018943 | 0.028466 |
| CH3 | -0.154217 | -0.099418 | -0.048939 | -0.030225 | -0.012535 | -0.004135 | 0.003920 | 0.011848 |
| Reag | -0.337392 | -0.210940 | -0.095730 | -0.053467 | -0.013798 | 0.004942 | 0.022863 | 0.040314 |

| Q,A | 200 | 100 |
| --- | --- | --- |
| 2.6 | 0.064940 | 0.075149 |
| 2.7 | 0.064420 | 0.074983 |
| 2.8 | 0.064231 | 0.074968 |
| 2.9 | 0.064110 | 0.074952 |
| 3.0 | 0.063809 | 0.074817 |
| 3.1 | 0.063321 | 0.074575 |
| 3.2 | 0.062482 | 0.074162 |
| 3.3 | 0.062479 | 0.074161 |
| 3.4 | 0.062167 | 0.073981 |
| 3.5 | 0.061708 | 0.073732 |
| 3.6 | 0.060314 | 0.073024 |
| CH3OH | 0.037070 | 0.045059 |
| CH3 | 0.018715 | 0.025145 |
| Reag | 0.055785 | 0.070204 |

2. CH2O + CH3

Table 6A. Noncorrected values of h

| Q,A | 2000 | 1500 | 1000 | 800 | 600 | 500 | 400 | 300 |
| --- | --- | --- | --- | --- | --- | --- | --- | --- |
| 2.5 | 0.141949 | 0.114523 | 0.089778 | 0.081107 | 0.073431 | 0.070044 | 0.067003 | 0.064343 |
| 2.6 | 0.148537 | 0.119583 | 0.093317 | 0.084031 | 0.075724 | 0.072009 | 0.068631 | 0.065618 |
| 2.7 | 0.148717 | 0.119799 | 0.093572 | 0.084293 | 0.075977 | 0.072248 | 0.068845 | 0.065792 |
| 2.8 | 0.148814 | 0.119914 | 0.093701 | 0.084421 | 0.076091 | 0.072347 | 0.068919 | 0.065827 |
| 2.9 | 0.148868 | 0.119977 | 0.093768 | 0.084482 | 0.076136 | 0.072376 | 0.068924 | 0.065795 |
| 3.0 | 0.148903 | 0.120018 | 0.093811 | 0.084521 | 0.076165 | 0.072395 | 0.068927 | 0.065772 |
| 3.1 | 0.148928 | 0.120047 | 0.093842 | 0.084548 | 0.076183 | 0.072404 | 0.068923 | 0.065747 |
| 3.2 | 0.148942 | 0.120063 | 0.093856 | 0.084561 | 0.076188 | 0.072403 | 0.068912 | 0.065720 |
| 3.3 | 0.148951 | 0.120072 | 0.093865 | 0.084567 | 0.076190 | 0.072400 | 0.068902 | 0.065700 |
| 3.4 | 0.148955 | 0.120076 | 0.093867 | 0.084568 | 0.076186 | 0.072392 | 0.068888 | 0.065677 |
| 3.5 | 0.148953 | 0.120073 | 0.093861 | 0.084559 | 0.076172 | 0.072375 | 0.068865 | 0.065645 |
| 3.6 | 0.148953 | 0.120072 | 0.093860 | 0.084556 | 0.076167 | 0.072368 | 0.068856 | 0.065632 |

| Q,A | 200 | 150 | 100 |
| --- | --- | --- | --- |
| 2.5 | 0.062079 | 0.061099 | 0.060222 |
| 2.6 | 0.062987 | 0.061827 | 0.060788 |
| 2.7 | 0.063104 | 0.061913 | 0.060855 |
| 2.8 | 0.063079 | 0.061848 | 0.060751 |
| 2.9 | 0.062989 | 0.061718 | 0.060574 |
| 3.0 | 0.062922 | 0.061620 | 0.060435 |
| 3.1 | 0.062863 | 0.061534 | 0.060314 |
| 3.2 | 0.062808 | 0.061458 | 0.060206 |
| 3.3 | 0.062769 | 0.061403 | 0.060129 |

Table 7A. Uncorrected values of g

| Q,A | 2000 | 1500 | 1000 | 800 | 600 | 500 | 400 | 300 |
| --- | --- | --- | --- | --- | --- | --- | --- | --- |
| 2.5 | -0.240072 | -0.148363 | -0.065512 | -0.035400 | -0.007348 | 0.005811 | 0.018325 | 0.030122 |
| 2.6 | -0.251532 | -0.155520 | -0.068884 | -0.037456 | -0.008245 | 0.005417 | 0.018367 | 0.030512 |
| 2.7 | -0.250364 | -0.154594 | -0.068187 | -0.036847 | -0.007723 | 0.005893 | 0.018793 | 0.030881 |
| 2.8 | -0.252643 | -0.156277 | -0.069268 | -0.037685 | -0.008321 | 0.005412 | 0.018426 | 0.030618 |
| 2.9 | -0.256464 | -0.159128 | -0.071146 | -0.039175 | -0.009425 | 0.004498 | 0.017698 | 0.030069 |
| 3.0 | -0.269298 | -0.161244 | -0.072543 | -0.040284 | -0.010248 | 0.003816 | 0.017154 | 0.029659 |
| 3.1 | -0.262196 | -0.163410 | -0.073977 | -0.041426 | -0.011099 | 0.003110 | 0.016590 | 0.029232 |
| 3.2 | -0.265620 | -0.165975 | -0.075682 | -0.042787 | -0.012117 | 0.002262 | 0.015910 | 0.028717 |
| 3.3 | -0.268650 | -0.168245 | -0.077192 | -0.043993 | -0.013021 | 0.001508 | 0.015306 | 0.028261 |
| 3.4 | -0.271688 | -0.170522 | -0.078700 | -0.045200 | -0.013927 | 0.00753 | 0.014700 | 0.027801 |
| 3.5 | -0.275938 | -0.173711 | -0.080837 | -0.046910 | -0.015212 | -0.00321 | 0.013836 | 0.027147 |
| 3.6 | -0.279715 | -0.176543 | -0.082729 | -0.048425 | -0.016349 | -0.01269 | 0.013076 | 0.026574 |

| Q,A | 200 | 150 | 100 |
| --- | --- | --- | --- |
| 2.5 | 0.041090 | 0.046201 | 0.050998 |
| 2.6 | 0.041706 | 0.046865 | 0.051653 |
| 2.7 | 0.041999 | 0.047110 | 0.051840 |
| 2.8 | 0.041825 | 0.046968 | 0.051716 |
| 2.9 | 0.041438 | 0.046650 | 0.051452 |
| 3.0 | 0.041149 | 0.046412 | 0.051253 |
| 3.1 | 0.040851 | 0.046170 | 0.051057 |
| 3.2 | 0.040494 | 0.045886 | 0.050836 |
| 3.3 | 0.040179 | 0.045638 | 0.050649 |

Table 8A. Imaginary frequencies

| Q, A | νi, cm-1 |
| --- | --- |
| 2.5 | 446.3 50.1 |
| 2.6 | 347.4 |
| 2.7 | 272.9 |
| 2.8 | 219.4 |
| 2.9 | 183.4 |
| 3.0 | 154.4 |
| 3.1 | 132.4 |
| 3.2 | 117.9 |
| 3.3 | 110.8 |
| 3.4 | 110.7 |
| 3.5 | 114.9 |
| 3.6 | 118.7 |

Table 9A. Corrected values of h

| Q,A | 2000 | 1500 | 1000 | 800 | 600 | 500 | 400 | 300 |
| --- | --- | --- | --- | --- | --- | --- | --- | --- |
| 2.5 | 0.153539 | 0.122965 | 0.095089 | 0.085179 | 0.076280 | 0.072294 | 0.068669 | 0.065454 |
| 2.6 | 0.154111 | 0.123585 | 0.095757 | 0.085854 | 0.076941 | 0.072930 | 0.069267 | 0.065987 |
| 2.7 | 0.154449 | 0.123954 | 0.096157 | 0.086255 | 0.077323 | 0.073290 | 0.069590 | 0.066252 |
| 2.8 | 0.154661 | 0.124182 | 0.096394 | 0.086487 | 0.077535 | 0.073482 | 0.069751 | 0.066353 |
| 2.9 | 0.154793 | 0.124321 | 0.096535 | 0.086620 | 0.077648 | 0.073578 | 0.069818 | 0.066387 |
| 3.0 | 0.154891 | 0.124425 | 0.096639 | 0.086719 | 0.077735 | 0.073652 | 0.069874 | 0.066413 |
| 3.1 | 0.154965 | 0.124502 | 0.096716 | 0.086792 | 0.077797 | 0.073705 | 0.069912 | 0.066427 |
| 3.2 | 0.155011 | 0.124549 | 0.096762 | 0.086835 | 0.077832 | 0.073733 | 0.069929 | 0.066426 |
| 3.3 | 0.155035 | 0.124574 | 0.096786 | 0.086856 | 0.077849 | 0.073744 | 0.069933 | 0.066420 |
| 3.4 | 0.155040 | 0.124578 | 0.096788 | 0.086857 | 0.077845 | 0.073736 | 0.069919 | 0.066397 |
| 3.5 | 0.155028 | 0.124566 | 0.096773 | 0.086839 | 0.077822 | 0.073711 | 0.069888 | 0.066357 |
| 3.6 | 0.155020 | 0.124557 | 0.096754 | 0.086828 | 0.077809 | 0.073696 | 0.069871 | 0.066337 |
| CH2O | 0.070089 | 0.056178 | 0.043556 | 0.039124 | 0.035208 | 0.033481 | 0.031920 | 0.030512 |
| CH3 | 0.072413 | 0.058999 | 0.046942 | 0.042688 | 0.038818 | 0.037041 | 0.035376 | 0.033828 |
| Reag. | 0.142502 | 0.115177 | 0.090498 | 0.081812 | 0.074026 | 0.070522 | 0.067296 | 0.064340 |

| Q,A | 200 | 150 | 100 |
| --- | --- | --- | --- |
| 2.5 | 0.062690 | 0.061497 | 0.060441 |
| 2.6 | 0.063128 | 0.061886 | 0.060799 |
| 2.7 | 0.063307 | 0.062011 | 0.060880 |
| 2.8 | 0.063339 | 0.061987 | 0.060795 |
| 2.9 | 0.063294 | 0.061892 | 0.060638 |
| 3.0 | 0.063267 | 0.061827 | 0.060520 |
| 3.1 | 0.063242 | 0.061769 | 0.060419 |
| 3.2 | 0.063210 | 0.061714 | 0.060327 |
| 3.3 | 0.063183 | 0.061669 | 0.060258 |
| CH2O | 0.029210 | 0.028575 | 0.027942 |
| CH3 | 0.032395 | 0.031721 | 0.031074 |
| Reag. | 0.061605 | 0.060296 | 0.059016 |

Table 10A. Corrected values of g

| Q,A | 2000 | 1500 | 1000 | 800 | 600 | 500 | 400 | 300 |
| --- | --- | --- | --- | --- | --- | --- | --- | --- |
| 2.5 | -0.269408 | -0.167899 | -0.076315 | -0.043113 | -0.012283 | 0.002120 | 0.015759 | 0.028437 |
| 2.6 | -0.261085 | -0.161506 | -0.071837 | -0.039396 | -0.009328 | 0.004691 | 0.017940 | 0.030313 |
| 2.7 | -0.261282 | -0.161565 | -0.071747 | -0.039245 | -0.009115 | 0.004930 | 0.018199 | 0.030582 |
| 2.8 | -0.264824 | -0.164168 | -0.073404 | -0.040523 | -0.010018 | 0.004211 | 0.017660 | 0.030210 |
| 2.9 | -0.269701 | -0.167791 | -0.075771 | -0.042389 | -0.011387 | 0.003088 | 0.016777 | 0.029560 |
| 3.0 | -0.273560 | -0.170660 | -0.077650 | -0.043872 | -0.012475 | 0.002194 | 0.016074 | 0.029044 |
| 3.1 | -0.277382 | -0.173507 | -0.079522 | -0.045355 | -0.013571 | 0.001291 | 0.015361 | 0.028515 |
| 3.2 | -0.281508 | -0.176591 | -0.081563 | -0.046978 | -0.014778 | 0.000290 | 0.014565 | 0.027920 |
| 3.3 | -0.284916 | -0.179140 | -0.083254 | -0.048326 | -0.015785 | -0.000547 | 0.013898 | 0.027420 |
| 3.4 | -0.287959 | -0.181421 | -0.084764 | -0.049535 | -0.016692 | -0.001303 | 0.013291 | 0.026959 |
| 3.5 | -0.291983 | -0.184442 | -0.086793 | -0.051160 | -0.017916 | -0.002327 | 0.012465 | 0.026332 |
| 3.6 | -0.295562 | -0.187128 | -0.088590 | -0.052601 | -0.018999 | -0.003232 | 0.011738 | 0.025782 |
| CH2O | -0.175387 | -0.115942 | -0.061004 | -0.040576 | -0.021199 | -0.011953 | -0.003036 | 0.005507 |
| CH3 | -0.154217 | -0.099418 | -0.048939 | -0.030225 | -0.012535 | -0.004135 | 0.003920 | 0.011569 |
| Reag. | -0.329604 | -0.215360 | -0.109943 | -0.070801 | -0.033734 | -0.016088 | 0.000884 | 0.017076 |

| Q,A | 200 | 150 | 100 |
| --- | --- | --- | --- |
| 2.5 | 0.040307 | 0.045737 | 0.050787 |
| 2.6 | 0.041652 | 0.046848 | 0.051651 |
| 2.7 | 0.041903 | 0.047074 | 0.051834 |
| 2.8 | 0.041679 | 0.046906 | 0.051702 |
| 2.9 | 0.041241 | 0.046560 | 0.051429 |
| 3.0 | 0.040896 | 0.046290 | 0.051217 |
| 3.1 | 0.040543 | 0.046014 | 0.051006 |
| 3.2 | 0.040140 | 0.045701 | 0.050772 |
| 3.3 | 0.039800 | 0.045437 | 0.050577 |
| CH2O | 0.013594 | 0.017411 | 0.021013 |
| CH3 | 0.018715 | 0.022042 | 0.025145 |
| Reag. | 0.032309 | 0.039453 | 0.046158 |

3. CH4 +HO2

Table 11A. Noncorrected values of h

| Q,A | 2500 | 2000 | 1500 | 1000 | 800 | 600 | 500 | 400 | 300 |
| --- | --- | --- | --- | --- | --- | --- | --- | --- | --- |
| 2.4 | 0.163329 | 0.136101 | 0.110327 | 0.087199 | 0.079146 | 0.072071 | 0.068985 | 0.066253 | 0.063905 |
| 2.5 | 0.163562 | 0.136385 | 0.110688 | 0.087676 | 0.079682 | 0.072667 | 0.069606 | 0.066889 | 0.064538 |
| 2.6 | 0.163746 | 0.136609 | 0.110969 | 0.088039 | 0.080084 | 0.073104 | 0.070055 | 0.067341 | 0.064975 |
| 2.7 | 0.171793 | 0.143098 | 0.115914 | 0.091455 | 0.082890 | 0.075296 | 0.071935 | 0.068901 | 0.066202 |
| 2.8 | 0.179796 | 0.149536 | 0.120793 | 0.094783 | 0.085599 | 0.077383 | 0.073706 | 0.070351 | 0.067318 |
| 2.9 | 0.179851 | 0.149603 | 0.120875 | 0.094887 | 0.085712 | 0.077503 | 0.073827 | 0.070468 | 0.067425 |
| 3.0 | 0.187793 | 0.155970 | 0.125676 | 0.098143 | 0.088362 | 0.079555 | 0.075585 | 0.071934 | 0.068601 |
| 3.1 | 0.187790 | 0.155971 | 0.125684 | 0.098173 | 0.088408 | 0.079626 | 0.075670 | 0.072035 | 0.068718 |
| 3.2 | 0.187797 | 0.155978 | 0.125690 | 0.098173 | 0.088402 | 0.079610 | 0.075647 | 0.072003 | 0.068673 |
| 3.3 | 0.187804 | 0.155985 | 0.125696 | 0.098173 | 0.088396 | 0.079685 | 0.075624 | 0.071971 | 0.068628 |

| Q,A | 250 | 200 | 150 |
| --- | --- | --- | --- |
| 2.4 | 0.062876 | 0.061963 | 0.061084 |
| 2.5 | 0.063495 | 0.062534 | 0.061654 |
| 2.6 | 0.063915 | 0.062929 | 0.062018 |
| 2.7 | 0.064966 | 0.063796 | 0.062694 |
| 2.8 | 0.065909 | 0.064560 | 0.063270 |
| 2.9 | 0.066005 | 0.064640 | 0.063330 |
| 3.0 | 0.067177 | 0.065694 | 0.064281 |
| 3.1 | 0.067166 | 0.065676 | 0.064256 |
| 3.2 | 0.067112 | 0.065609 | 0.064171 |
| 3.3 | 0.067057 | 0.065542 | 0.064086 |

Table 12A. Noncorrected values of g

| Q,A | 2500 | 2000 | 1500 | 1000 | 800 | 600 | 500 | 400 |
| --- | --- | --- | --- | --- | --- | --- | --- | --- |
| 2.4 | -0.306671 | -0.215614 | -0.131255 | -0.055198 | -0.027598 | -0.001904 | 0.010148 | 0.021616 |
| 2.5 | -0.307381 | -0.216490 | -0.131831 | -0.055441 | -0.027690 | -0.001831 | 0.010310 | 0.021872 |
| 2.6 | -0.310092 | -0.218258 | -0.133094 | -0.056174 | -0.028201 | -0.002108 | 0.010153 | 0.021836 |
| 2.7 | -0.345989 | -0.245534 | -0.152140 | -0.067513 | -0.036654 | -0.007830 | 0.005723 | 0.018634 |
| 2.8 | -0.392695 | -0.281466 | -0.177693 | -0.083215 | -0.048617 | -0.016210 | -0.000941 | 0.013623 |
| 2.9 | -0.372891 | -0.265611 | -0.165783 | -0.075244 | -0.042218 | -0.011382 | 0.003103 | 0.016882 |
| 3.0 | -0.376750 | -0.267279 | -0.165657 | -0.073852 | -0.040519 | -0.009527 | 0.004965 | 0.018691 |
| 3.1 | -0.392008 | -0.279486 | -0.174811 | -0.079949 | -0.045388 | -0.013164 | 0.001947 | 0.016295 |
| 3.2 | -0.394691 | -0.281630 | -0.176418 | -0.081019 | -0.046245 | -0.013809 | 0.001406 | 0.015857 |
| 3.3 | -0.396879 | -0.283380 | -0.177728 | -0.081892 | -0.046943 | -0.014336 | 0.000964 | 0.015498 |

| Q,A | 300 | 250 | 200 | 150 |
| --- | --- | --- | --- | --- |
| 2.4 | 0.032446 | 0.037597 | 0.042550 | 0.047278 |
| 2.5 | 0.032796 | 0.037993 | 0.042989 | 0.047753 |
| 2.6 | 0.032882 | 0.038136 | 0.043185 | 0.047994 |
| 2.7 | 0.030821 | 0.036610 | 0.042155 | 0.047412 |
| 2.8 | 0.027383 | 0.033914 | 0.040167 | 0.046087 |
| 2.9 | 0.029855 | 0.035991 | 0.041846 | 0.047364 |
| 3.0 | 0.031539 | 0.036289 | 0.042306 | 0.047958 |
| 3.1 | 0.029770 | 0.036123 | 0.042171 | 0.047851 |
| 3.2 | 0.029432 | 0.035833 | 0.041926 | 0.047649 |
| 3.3 | 0.029152 | 0.035592 | 0.041721 | 0.047476 |

Table 13A. Imaginary frequencies

| Q, A | νi, cm-1 |
| --- | --- |
| 2.4 | 480.4 275.3 32.5 |
| 2.5 | 365.6 202.9 27.9 |
| 2.6 | 281.0 141.9 19.5 |
| 2.7 | 211.5 79.7 |
| 2.8 | 147.2 |
| 2.9 | 79.6 |

Table 14A. Corrected values of h h

| Q,A | 2500 | 2000 | 1500 | 1000 | 800 | 600 | 500 | 400 | 300 |
| --- | --- | --- | --- | --- | --- | --- | --- | --- | --- |
| 2.4 | 0.185350 | 0.153389 | 0.122892 | 0.095069 | 0.085157 | 0.076250 | 0.072266 | 0.068660 | 0.065482 |
| 2.5 | 0.185992 | 0.154074 | 0.123643 | 0.095912 | 0.086042 | 0.077166 | 0.073186 | 0.069564 | 0.066336 |
| 2.6 | 0.186510 | 0.154628 | 0.124247 | 0.096585 | 0.086743 | 0.077886 | 0.073904 | 0.070267 | 0.066993 |
| 2.7 | 0.186974 | 0.155116 | 0.124769 | 0.097153 | 0.087328 | 0.078479 | 0.074493 | 0.070840 | 0.067530 |
| 2.8 | 0.187382 | 0.155540 | 0.125215 | 0.097626 | 0.087812 | 0.078967 | 0.074977 | 0.071312 | 0.067972 |
| 2.9 | 0.187588 | 0.155757 | 0.125446 | 0.097876 | 0.088068 | 0.079227 | 0.075236 | 0.071562 | 0.068205 |
| 3.0 | 0.187793 | 0.155970 | 0.125676 | 0.098143 | 0.088362 | 0.079555 | 0.075585 | 0.071934 | 0.068601 |
| 3.1 | 0.187790 | 0.155971 | 0.125684 | 0.098173 | 0.088408 | 0.079626 | 0.075670 | 0.072035 | 0.068718 |
| 3.2 | 0.187797 | 0.155978 | 0.125690 | 0.098173 | 0.088402 | 0.079610 | 0.075647 | 0.072003 | 0.068673 |
| 3.3 | 0.187804 | 0.155985 | 0.125696 | 0.098173 | 0.088396 | 0.079685 | 0.075624 | 0.071971 | 0.068628 |
| CH4 | 0.113245 | 0.094957 | 0.077844 | 0.062864 | 0.057820 | 0.053510 | 0.051667 | 0.050042 | 0.048588 |
| HO2 | 0.058802 | 0.048447 | 0.038443 | 0.029045 | 0.025551 | 0.022274 | 0.020741 | 0.019292 | 0.017932 |
| Reag. | 0.172047 | 0.143404 | 0.116287 | 0.091909 | 0.083371 | 0.075784 | 0.072408 | 0.069334 | 0.066520 |

| Q,A | 250 | 200 | 150 |
| --- | --- | --- | --- |
| 2.4 | 0.064066 | 0.062797 | 0.061607 |
| 2.5 | 0.064872 | 0.063513 | 0.062273 |
| 2.6 | 0.065492 | 0.064078 | 0.062765 |
| 2.7 | 0.065995 | 0.064534 | 0.063156 |
| 2.8 | 0.066412 | 0.064916 | 0.063486 |
| 2.9 | 0.066629 | 0.065109 | 0.063646 |
| 3.0 | 0.067177 | 0.065694 | 0.064281 |
| 3.1 | 0.067166 | 0.065676 | 0.064256 |
| 3.2 | 0.067112 | 0.065609 | 0.064171 |
| 3.3 | 0.067057 | 0.065542 | 0.064086 |
| CH4 | 0.047953 | 0.047311 | 0.046677 |
| HO2 | 0.017280 | 0.016640 | 0.016005 |
| Reag. | 0.065233 | 0.063951 | 0.062682 |

Table 15A. Corrected values of g

| Q,A | 2500 | 2000 | 1500 | 1000 | 800 | 600 | 500 | 400 |
| --- | --- | --- | --- | --- | --- | --- | --- | --- |
| 2.4 | -0.364681 | -0.258126 | -0.159464 | -0.070705 | -0.038629 | -0.008926 | 0.004913 | 0.017990 |
| 2.5 | -0.371204 | -0.263212 | -0.163099 | -0.072861 | -0.040180 | -0.009864 | 0.004284 | 0.017670 |
| 2.6 | -0.380873 | -0.270840 | -0.168675 | -0.076364 | -0.042846 | -0.011685 | 0.002887 | 0.016694 |
| 2.7 | -0.387707 | -0.276212 | -0.172578 | -0.078784 | -0.044666 | -0.012902 | 0.001972 | 0.016078 |
| 2.8 | -0.412564 | -0.296014 | -0.187320 | -0.088457 | -0.052310 | -0.018513 | -0.002624 | 0.012498 |
| 2.9 | -0.397475 | -0.283901 | -0.178179 | -0.082283 | -0.047320 | -0.014706 | 0.000593 | 0.015122 |
| 3.0 | -0.376750 | -0.267279 | -0.165657 | -0.073852 | 0.040519 | -0.009527 | 0.004965 | 0.018691 |
| 3.1 | -0.392008 | -0.279486 | -0.174811 | -0.079949 | -0.045388 | -0.013164 | 0.001947 | 0.016295 |
| 3.2 | -0.394691 | -0.281630 | -0.176418 | -0.081019 | -0.046245 | -0.013809 | 0.001406 | 0.015857 |
| 3.3 | -0.396879 | -0.283380 | -0.177728 | -0.081892 | -0.046943 | -0.014336 | 0.000964 | 0.015498 |
| CH4 | -0.207414 | -0.145261 | -0.087582 | -0.035351 | -0.016261 | 0.001653 | 0.010130 | 0.018259 |
| HO2 | -0.250583 | -0.189823 | -0.131635 | -0.076741 | -0.055962 | -0.036038 | -0.026456 | -0.017932 |
| Reag. | -0.457997 | -0.335084 | -0.219217 | -0.112092 | -0.072223 | -0.034385 | -0.016326 | 0.000327 |

| Q,A | 300 | 250 | 200 | 150 |
| --- | --- | --- | --- | --- |
| 2.4 | 0.030213 | 0.035965 | 0.041443 | 0.046613 |
| 2.5 | 0.030192 | 0.036087 | 0.041697 | 0.046978 |
| 2.6 | 0.029632 | 0.035725 | 0.041525 | 0.046981 |
| 2.7 | 0.029305 | 0.035541 | 0.041474 | 0.047048 |
| 2.8 | 0.026737 | 0.033471 | 0.049898 | 0.045955 |
| 2.9 | 0.028765 | 0.035199 | 0.041321 | 0.047066 |
| 3.0 | 0.031539 | 0.036289 | 0.042306 | 0.047958 |
| 3.1 | 0.029770 | 0.036123 | 0.042171 | 0.047851 |
| 3.2 | 0.029432 | 0.035833 | 0.041926 | 0.047649 |
| 3.3 | 0.029152 | 0.035592 | 0.041721 | 0.047476 |
| CH4 | 0.026145 | 0.029715 | 0.033293 | 0.036711 |
| HO2 | -0.008245 | -0.003940 | 0.000235 | 0.004249 |
| Reag. | 0.017900 | 0.025775 | 0.033528 | 0.040960 |
